# Supplementary material
Source: MDPI journal article supplement (https://www.mdpi.com/2673-9992/14/1/139)
Supplement: s1 [file s1]

# THE SYNTHESIS AND BIOLOGICAL ACTIVITY OF AMIDRAZONE DERIVATIVES OBTAINED IN REACTION WITH *CIS*-1,2,3,6-TETRAHYDROPHTHALIC ANHYDRIDE

Renata Paprocka<sup>1</sup>, Małgorzata Wiese-Szadkowska<sup>2</sup>, Jolanta Kutkowska<sup>3</sup>, Adam Kowalewski<sup>4,5</sup>

<sup>1</sup> Department of Organic Chemistry, Faculty of Pharmacy, Nicolaus Copernicus University, Poland; <sup>2</sup> Department of Immunology, Faculty of Pharmacy, Nicolaus Copernicus University, Poland; <sup>3</sup> Department of Genetics and Microbiology, Maria Curie-Skłodowska University, Poland; <sup>4</sup> Department of Clinical Pathomorphology, Nicolaus Copernicus University, Poland, <sup>5</sup> Department of Tumor Pathology and Pathomorphology, Oncology Center Prof. Łukaszczyk Memorial Hospital, Poland.

## Introduction

Amidrazone derivatives are known for the broad biological activity: antimicrobial, anti-inflammatory, antiparasitic, antitumor and others [1]. Searching for new drugs twelve new derivatives were obtained in reaction of *N*<sup>3</sup>-substituted amidrazones with *cis*-1,2,3,6-tetrahydrophthalic anhydride (Fig. 1). The structures of obtained linear compounds **8-13** and 1,2,4-triazole derivatives **14-19** were confirmed by <sup>1</sup>H NMR, <sup>13</sup>C NMR and MS.

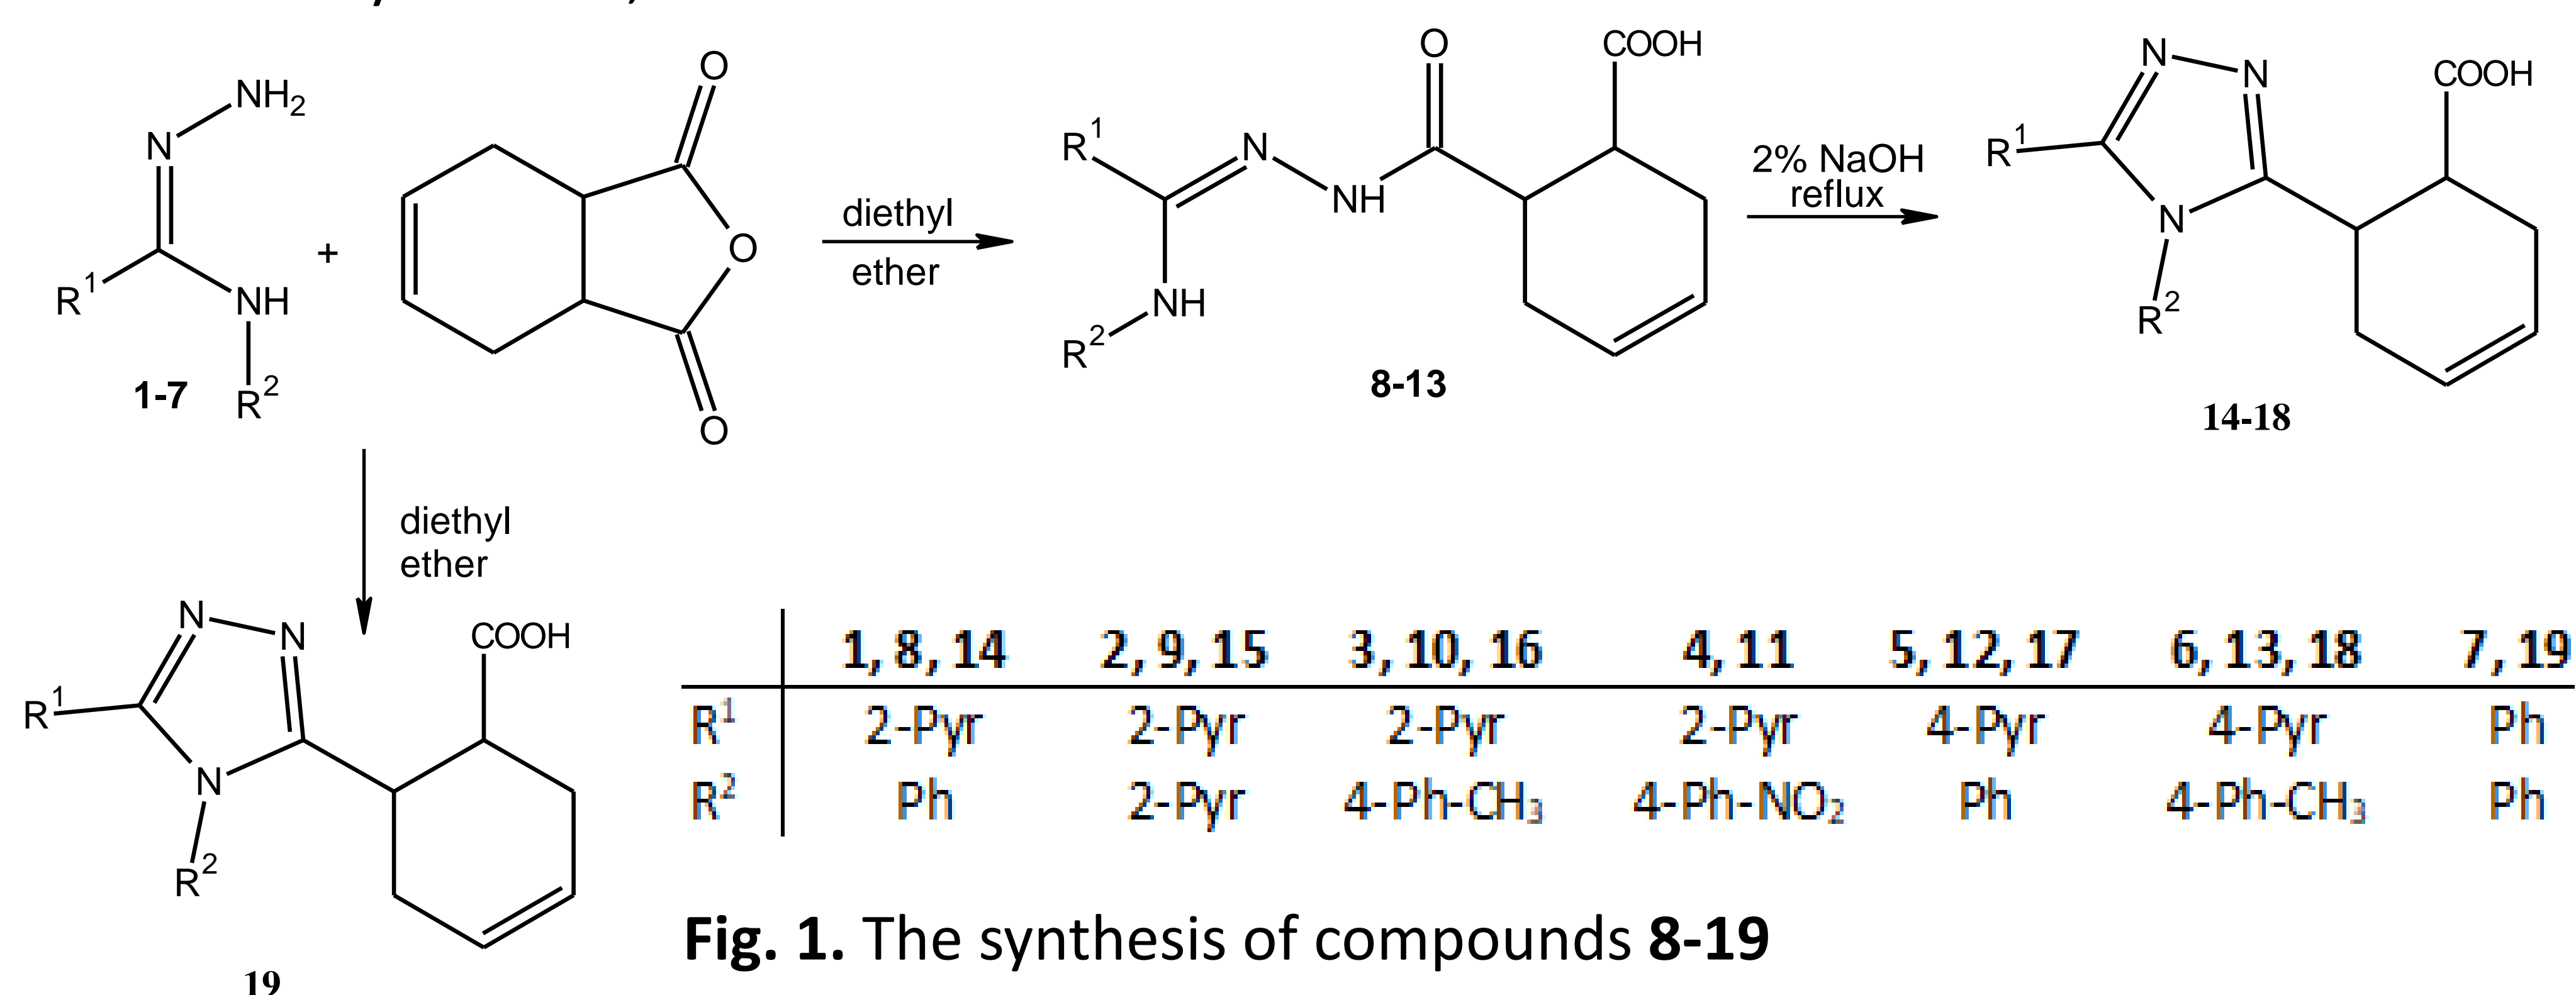

Fig. 1. The synthesis of compounds **8-19**

Toxicity and anti-inflammatory activity of compounds **14-17** and **19** (at concentrations of 10, 50 and 100 µg/mL) were studied in human peripheral blood mononuclear cells (PBMC). The influence of compounds on cytokine production (TNF-α, IL-6 and IL-10) was examined in PBMC cultures stimulated by lipopolysaccharide (LPS) and their antiproliferative activity in PBMC cultures stimulated by phytohaemagglutinin (PHA).

## Results

Triazole derivatives **14-17** and **19** showed low toxicity towards PBMC cultures at concentration range 10-100 µg/mL (Fig. 2-3). Only compound **19** showed significant antiproliferative activity in PBMC cultures stimulated by phytohaemagglutinin at the highest dose (results not shown).

The compounds **14-17** and **19** showed a beneficial effect on cytokine synthesis: inhibition of pro-inflammatory TNF-α and increase of anti-inflammatory IL-10. (Fig. 4-5). Two linear compounds showed moderate antibacterial activity: derivative **10** inhibited growth of *Mycobacterium smegmatis* and derivative **12** of *Staphylococcus aureus* with minimum inhibitory concentrations MICs = 64 µg/mL.

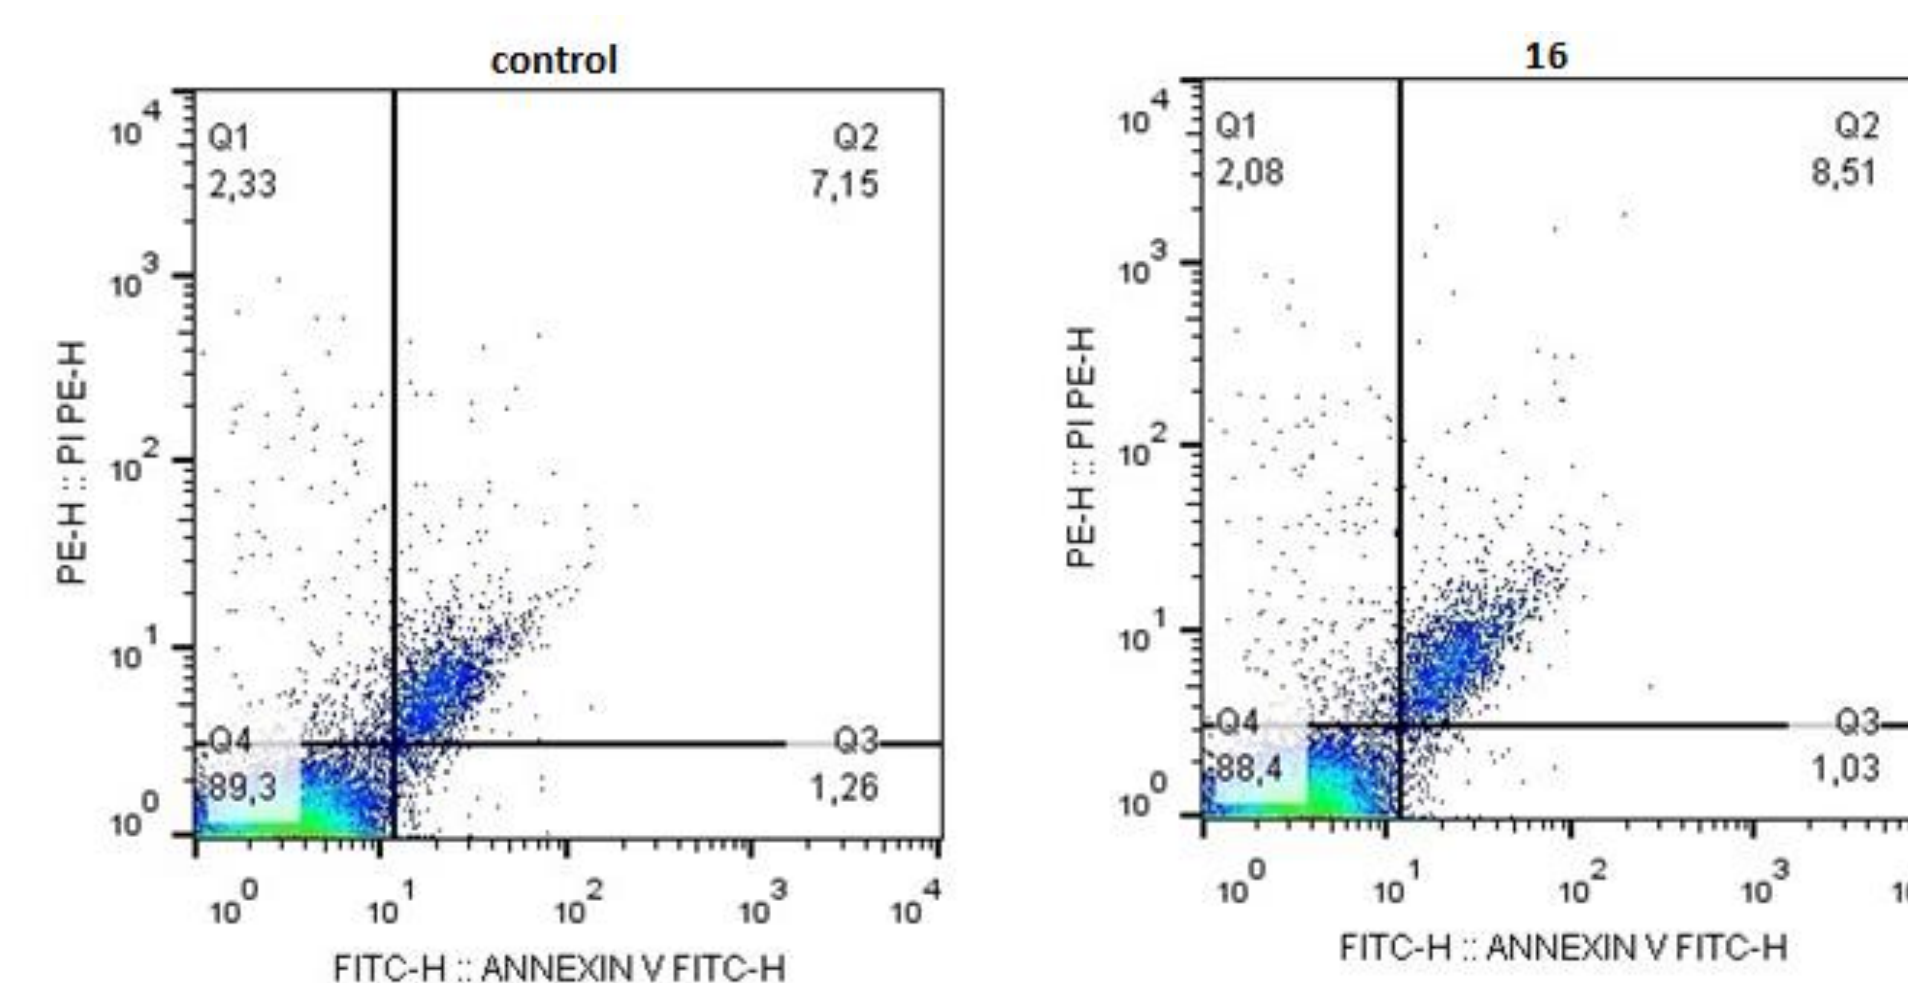

Fig. 2. Control PBMC culture

Fig. 3. Toxicity of **16** (100µg/mL)

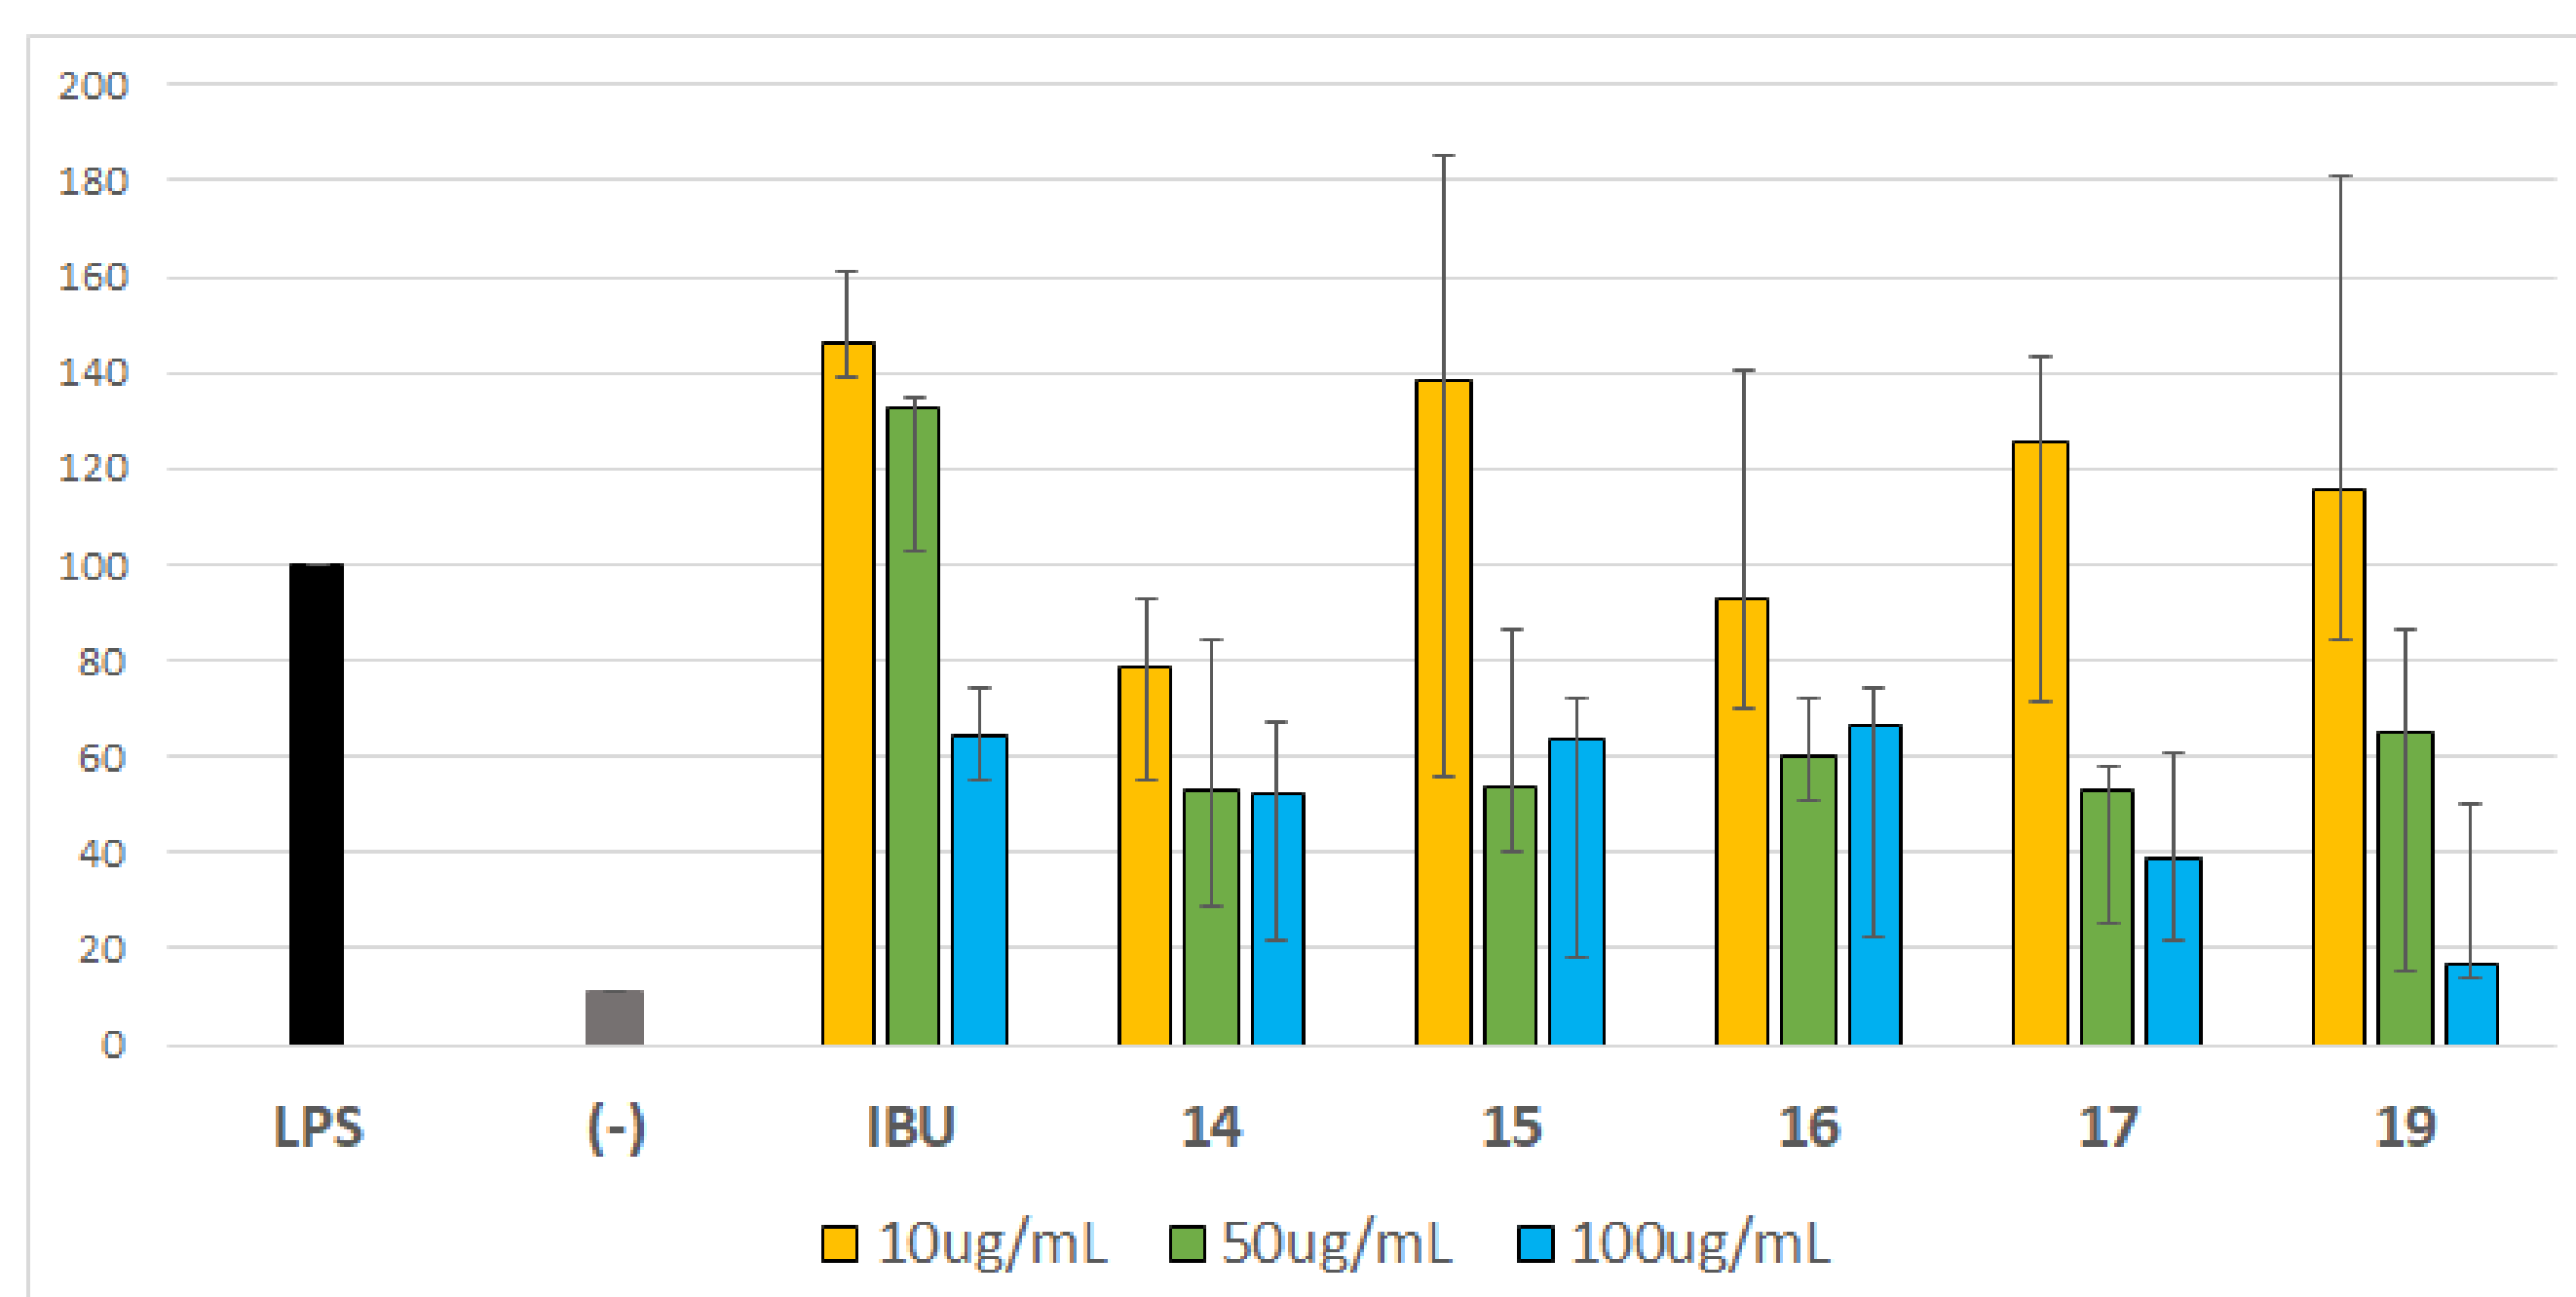

Fig. 4. The influence of compounds on TNF-α production

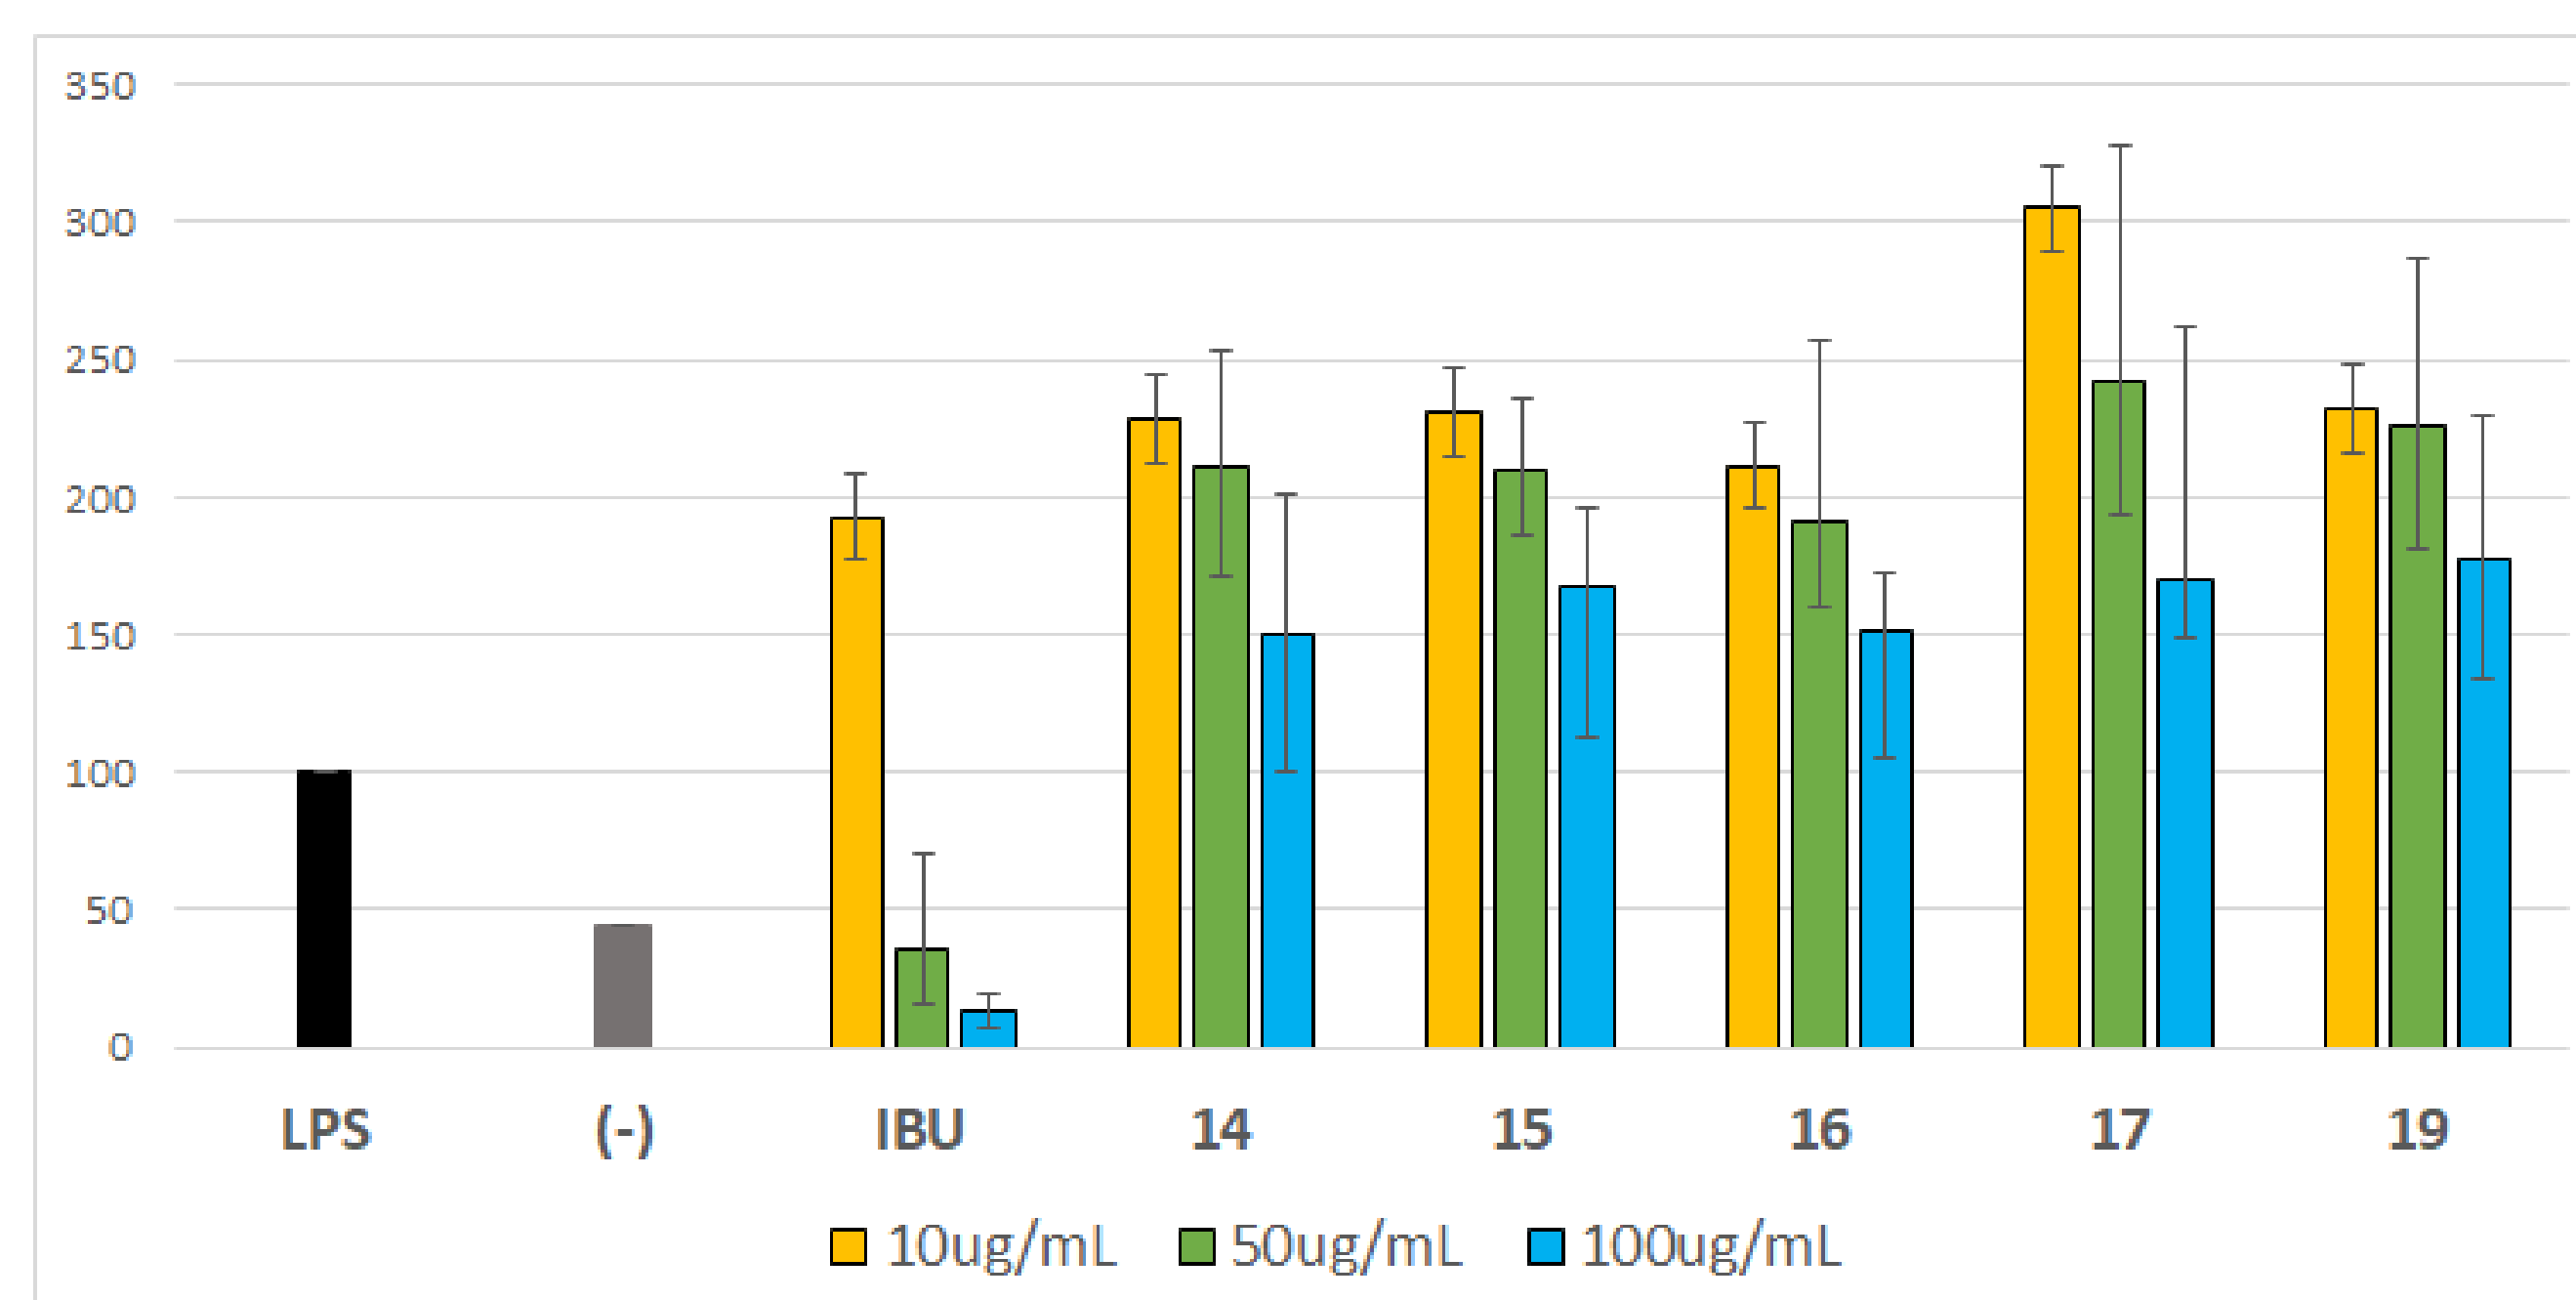

Fig. 5. The influence of compounds on IL-10 production

## Conclusion

Five obtained 1,2,4-triazole derivatives **14-17** and **19** showed a strong anti-inflammatory activity. The strongest effect was observed for compound **19** (possesing two phenyl substituents), which also showed antiproliferative properties and deserves further research. Cyclic compounds **14-17** and **19** showed no antimicrobial activity, however two linear derivatives **10** and **12** moderately inhibited growth *M. smegmatis* and *S. aureus*.

## References

1. Paprocka, R.; Wiese-Szadkowska, M.; Kosmowski et. all. A Review of the Biological Activity of Amidrazone Derivatives. *Pharmaceuticals* 2022, 15, 1219. <https://doi.org/10.3390/ph15101219>.

ECMC  
2022

The 8th International Electronic  
Conference on Medicinal Chemistry  
01-30 NOVEMBER 2022 | ONLINE
